# Supplementary material
Source: MDPI journal article supplement (https://www.mdpi.com/2079-3197/10/5/69)
Supplement: s1 [file s1]

Archive with 1 entries (1 files):
- computation-1666119-supplementary.pdf
